# Supplementary material for: A novel Slide-seq based image processing software to identify gene expression at the single cell level
Source: PubMed Central journal article supplement (PMC11254742; doi:10.1016/j.jpi.2024.100384), 2024-05-31
Supplement: mmc1.pdf [file mmc1.pdf]

1 A novel Slide-seq based image processing  
2 software to identify gene expression at the  
3 single cell level

4 <sup>3,4,\*</sup>Th. I. Götz, <sup>3</sup>X. Cong, <sup>3</sup>S. Rauber, <sup>3</sup>M. Angeli, <sup>2</sup>E. W. Lang,  
<sup>3</sup>A. Ramming, <sup>1,4</sup>C. Schmidkonz

<sup>1</sup>Department of Nuclear Medicine, University Hospital Erlangen,  
91054 Erlangen, Germany

<sup>2</sup>CIML Group, Biophysics, University of Regensburg,  
93040 Regensburg, Germany

<sup>3</sup>Department of Internal Medicine, University Hospital Erlangen,  
Erlangen, Germany

<sup>4</sup>Department of Industrial Engineering and Health,  
Technical University of Applied Sciences Amberg-Weiden,  
Weiden, Germany

\*Corresponding Author email:t.goetz@oth-aw.de

**Keywords:** Cell Segmentation, pruning, Deep Neural Networks,  
Slide-seq, DNN complexity

5

May 26, 2024

6

## Abstract

7

8

9

10

11

12

13

14

15

16

17

Analysis of gene expression at the single-cell level could help predict the effectiveness of therapies in the field of chronic inflammatory diseases such as arthritis. Here we demonstrate an adopted approach for processing images from the Slide-seq method. Using a puck, which consists of about 50000 DNA barcode beads, an RNA sequence of a cell is to be read. The pucks are repeatedly brought into contact with liquids and then recorded with a conventional epifluorescence microscope. The image analysis initially consists of stitching the partial images of a sequence recording, registering images from different sequences and finally reading out the bases. The new method enables the use of an inexpensive epifluorescence microscope instead of a confocal microscope.

## 18 **1 Introduction**

19

20

21

22

23

24

25

26

27

28

29

30

31

32

33

34

35

36

37

38

39

40

41

42

43

Mapping gene expression at the single-cell level within tissues remains a technical challenge.[2, 18] Measurement of the location of molecules in tissues is essential for understanding tissue formation and function defining molecular pathways involved in several disease states [10, 6]. The identification of spatially defined gene expression patterns can provide insights into the development and maintenance of complex tissue architectures and the molecular characterization of pathological states. Formerly, technologies for spatially encoded RNA sequencing with barcoded oligonucleotide capture arrays were limited to resolutions in hundreds of micrometers limiting the detection of tissue features [15]. Rodrigues et al. developed the Slide-seq method which enables the transcriptome-wide detection of RNAs with a spatial resolution of  $10\mu m$  [14]. In Slide-seq, freshly frozen tissue can be sliced onto prepared arrays of DNA-barcoded beads termed pucks, causing RNA in the tissue to transfer onto the beads. Subsequent library preparation yields data that is equivalent to single cell RNA sequencing data, but with a spatial location associated with each bead. The authors herewith presented a scalable method for obtaining spatially resolved gene expression data at resolutions that are comparable to the size of individual cells. In contrast to imaging-based transcriptomics that enable the identification of preselected genes in fixed specimens, array-based approaches decouple the imaging from molecular sampling and allow for transcriptome-wide identification of molecular patterns in tissue sections [19]. Since Slide-seq's low transcript detection sensitivity limited the applicability to different disease states Stickels et al. presented a novel protocol, termed Slide-seqV2 [16]. This improved method demonstrated an order of magnitude higher sensitivity by improving bead synthesis and array indexing to reach an RNA capture efficiency of about 50% of that of single-cell RNA-seq data. Slide-seq can

44 be easily integrated with large-scale scRNA-seq datasets and can facilitate the  
45 discovery of spatially defined gene expression patterns in normal and diseased tis-  
46 sues at reduced costs [14]. Commercially available spatial transcriptomic arrays  
47 are expensive, the readout demands on high computational power and data pro-  
48 cessing is very slow [17, 20]. Therefore, the use of such arrays is very limited.  
49 On the other hand, the functional heterogeneity of inflammatory cells exhibit a  
50 high degree of spatial organization that influences the local microenvironment,  
51 i.e. whether it supports inflammation or allows switching into resolution of in-  
52 flammation [3, 1, 11]. In arthritis, the lining and sublining compartments of the  
53 synovium are particularly prominent, with the sublining compartment having a  
54 high degree of diversity containing pro-inflammatory and pro-resolving cell types  
55 [5, 9, 4]. The spatiotemporal distribution of cells and gene expression is therefore  
56 of interest for understanding the spatial orchestration of resolution processes in  
57 arthritis. To date, scRNAseq following tissue dissociation has provided unbiased  
58 insights into the cellular composition of synovial tissue, but it lacks information  
59 about cellular neighbourhood and segregations [21, 22]. The goal of our work  
60 was to establish a complete image processing pipeline to identify gene expression  
61 at the single cell level by using machine learning algorithms and conventional  
62 epifluorescence microscopy to reduce costs and increase the availability of this  
63 approach.

## 64 **2 Method**

65 In this study we present a methodology to process images collected by the Slide-  
66 seq method. The latter transfers RNA from tissue sections onto a surface cov-  
67 ered with DNA barcode beads with known positions, allowing the locations of the  
68 RNA to be deduced by sequencing. In cell analysis, so-called pucks, with a size of  
69 3mm, are applied to a carrier material. A puck consists of about 50,000 DNA bar-  
70 code beads, which carry attached RNA sequences. These pucks are successively  
71 brought into contact with 14 different liquids and then different fluorescence im-  
72 ages and one brightfield image are taken. After the puck has been sequenced, a  
73 cell sample is applied and the RNA sequence is read out. Further details of the  
74 exact procedure can be found here [14].

### 75 **2.1 Data set**

76 For this study, 14 images were taken from each of seven different pucks with a  
77 THUNDER Imager Live Cell and 3D Assay from Leica Microsystems. Each of  
78 these 14 images consists of 9 partial images due to the limited field of view of  
79 the microscope (see Figure 1). The spatial resolution is  $1024 \times 1024$  pixels per

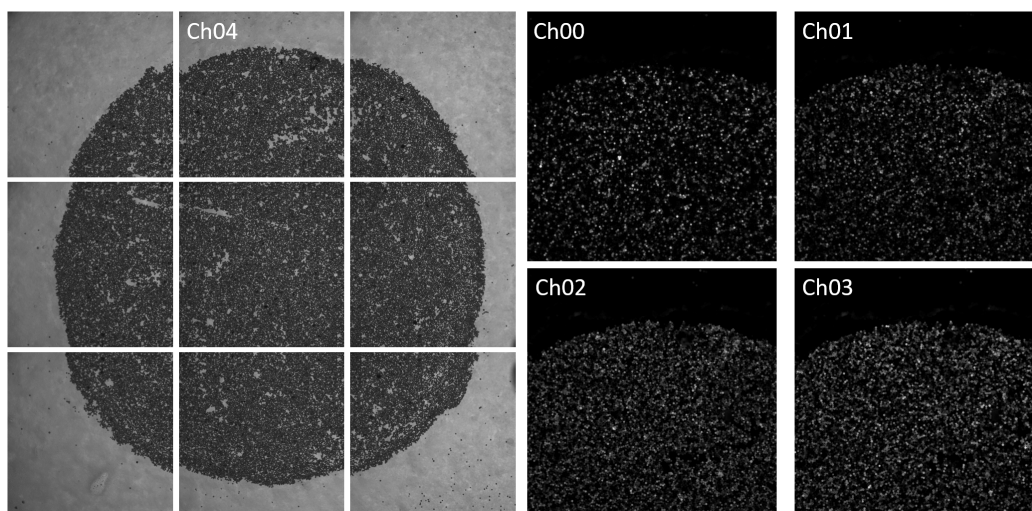

Figure 1: Left: Nine partial images of one puck in the visible light range (image size  $1024 \times 1024$ ), Right: four fluoreszenz channels of one partial image

80 partial image. Nine partial images depict the entire puck. Each partial image is  
 81 recorded with four different fluorescence wavelengths ( $475nm$ ,  $555nm$ ,  $575nm$ ,  
 82  $635nm$ ) and an additional recording is taken in the visible light range. By adding  
 83 hybridization buffers containing different dye-conjugated oligonucleotides, beads  
 84 carrying different DNA bases interact with different oligonucleotides, hence emit  
 85 fluorescent light at different wavelengths. Consequently, depending on the fluo-  
 86 rescence channel in which a bead is visible, the base it is carrying can be identified  
 87 easily. Additionally, an image of a puck was acquired in an epifluorescence mi-  
 88 croscope and a confocal microscope to generate an image data set that was well  
 89 suited to train neural network algorithms. These image data sets are referred with  
 90 AddImg in the following. An overview of the acquired images is given in Table 1.

91 The aim of this project is to identify a characteristic sequence of 14 bases for  
 92 each of the roughly 50000 beads. This, however, presupposes that the same bead  
 93 can be identified in different images. But probe handling introduces a severe ob-  
 94 stacle here: The pucks need to be brought into contact with liquids containing  
 95 different dyes. 14 sequences need to be performed for each puck. Between the  
 96 sequences, the puck is removed from the microscope and washed with a dye - con-  
 97 taining liquid before it is placed back in the microscope. Each time this changes  
 98 the position of the puck relative to the microscope and renders the taken images  
 99 incongruent. In addition, some beads are washed away by the application of liq-  
 100 uid (see Figure 2). Finally, the gray values of the beads are varying between the  
 101 sequences and the partial images because of varying characteristics of the optical  
 102 mapping. All these shortcomings render data processing rather challenging.

| Images per puck                    |                                |       |       |       |       |
|------------------------------------|--------------------------------|-------|-------|-------|-------|
| Channels                           | Bright field                   | 475nm | 555nm | 575nm | 635nm |
| partial images one sequence        | 9                              | 9     | 9     | 9     | 9     |
| partial images 14 sequences        | 126                            | 126   | 126   | 126   | 126   |
| Images of 7 puck                   |                                |       |       |       |       |
| Channels                           | Bright field                   | 475nm | 555nm | 575nm | 635nm |
| partial images                     | 63                             | 63    | 63    | 63    | 63    |
| partial images 14 sequences        | 882                            | 882   | 882   | 882   | 882   |
| Images of two microscopes (AddImg) |                                |       |       |       |       |
| Channels                           | Bright field                   | 475nm | 555nm | 575nm | 635nm |
| partial images Thunder             | 9                              | 9     | 9     | 9     | 9     |
| Channels                           | Bright field                   | 405nm | 488nm | 552nm | 638nm |
| partial images Confocal            | 9                              | 9     | 9     | 9     | 9     |
| partial images 14 sequences        | only one sequence was acquired |       |       |       |       |

Table 1: In this table an overview of the acquired images is given.

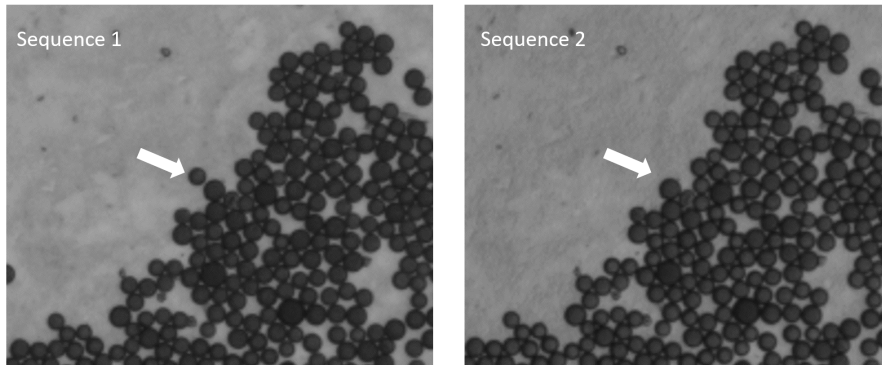

Figure 2: Same puck region in two different sequence images(image size  $50 \times 50$ ). The bead, which was washed away is marked with an arrow.

## 103 2.2 Image statistics

104 Image statistics were evaluated with the goal to find out how evenly the beads are  
105 distributed over the puck, how often beads are washed off and in which sequence.  
106 First manual evaluations were carried out to quantify the mismatch between im-  
107 ages of a sequence. The same area of every puck was cut out for each sequence,  
108 allowing differences in the number of beads and their positional changes to be  
109 identified across the 14 sequences. For the first puck 1288 partial images for all

110 14 sequences were divided into small image patches containing  $50 \times 50$  pixels.  
111 The size of this image section is sufficient to identify changes between the two  
112 sequences. However, using larger sections resulted in poorer change detection be-  
113 cause of reduced clarity. Only the visible beads that were completely within the  
114 partial image section were counted for each image patch.

115 In addition, manual evaluations were used to train the learning system. For  
116 the localization of the beads, a segmentation of all beads in one partial image was  
117 required. To generate the segmentation, a partial image of the epifluorescence  
118 microscope was taken from the AddImg data set. During segmentation, the center  
119 points of the beads were identified while maintaining a 2-3 pixel margin from the  
120 boundary of the beads.

121 Manual labeling on the AddImg data set was also required for the estimation  
122 of the bases in the epifluorescence microscope. Estimation was based on the use  
123 of the gray values of the fluorescence images in the epifluorescence microscope.  
124 For this purpose, the associated beads were searched for in the epifluorescence  
125 microscope image for 1746 beads in an image section in the confocal microscope  
126 and the respective gray values in the fluorescence image were saved together with  
127 the color value in the confocal image. Since spectral separation in the confocal  
128 microscope is much higher, the thereby estimated base is taken as ground truth.

129 Manual analyses were also performed to estimate algorithm accuracy. With  
130 the algorithm presented in this work, a base sequence per bead can be determined.  
131 For this it is essential that the same bead is identified in all 14 sequence images.  
132 In order to check this, 1000 determined bead positions in 14 sequences each were  
133 checked visually for correctness.

## 134 **2.3 Image Analysis**

135 The image analysis can be divided into the following steps:

- 136 • Preprocessing of partial images
  - 137 – Calculation of binary mask
  - 138 – Image Stitching
  - 139 – Rough registration
- 140 • Accurate registration
- 141 • Base estimation

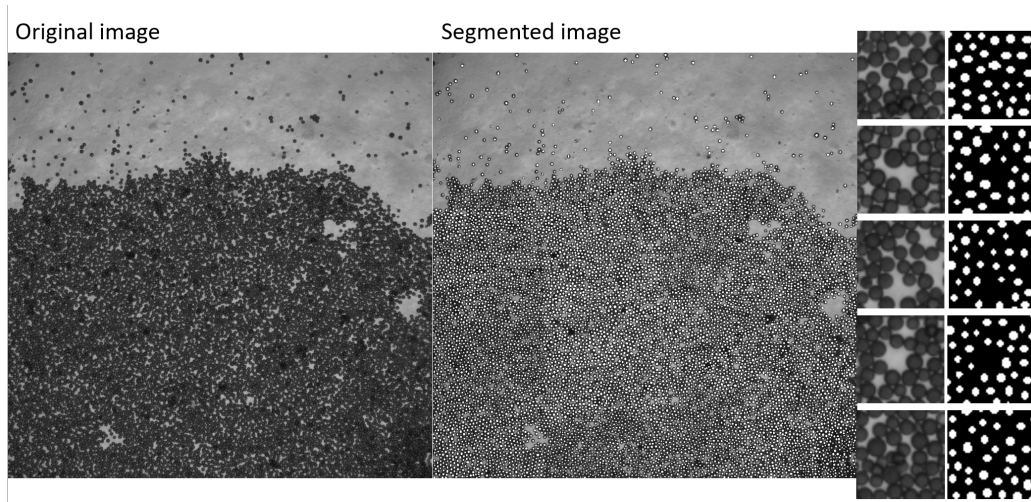

Figure 3: On the left side the original image and the manually segmented is shown and on the right side the cropped patches used for training.

### 142 2.3.1 Preprocessing of partial images

143 Due to the different puck positions when taking an image repeatedly, identical  
 144 beads have different gray values in the individual images. Hence optimizing gray  
 145 value differences between pairs of beads across a sequence of images is meaning-  
 146 less. For this reason, a binary mask was first calculated from the images in the  
 147 visible light range. To do so, for one image we segmented manually all 9824 vis-  
 148 ible beads. Afterwards a neural network was trained with cropped image patches  
 149 of dimension  $50 \times 50$  pixels (see Figure 3). The network architecture is shown in  
 150 Figure 4. For training an ADAM optimizer was used and the binary cross entropy  
 151 was chosen as loss function. Only the central area of the bead has been segmented  
 152 by the small neural network, and not the borders, because the segments should not  
 153 overlap. From the single segments the center point for each bead can be estimated  
 154 by taking the mean position of each segment. At each position a circle with a  
 155 defined radius is generated in an empty image.

156 The binary masks make it easier to stitch and register the images. The next  
 157 step is the stitching of the sub-images into a large overall image. From the image  
 158 recording with the microscope it is known that the overlap of two images is 10%  
 159 of the image size. First, two horizontally adjacent images are selected and the sum  
 160 of the positional differences in the overlapping region is calculated. This serves as  
 161 an optimization function. The position of the second image is shifted horizontally  
 162 until the minimum value is reached. Six of these pairs of images exist in the  
 163 horizontal direction. Once the relative displacement of two images is known, an  
 164 overall image can be created. This is not yet optimized, especially in the vertical

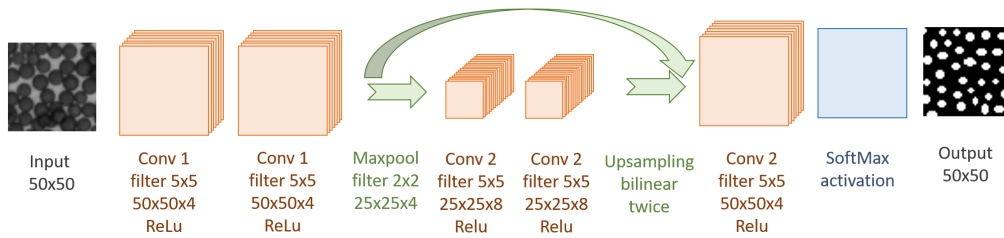

Figure 4: The architecture of the neural network for the rough segmentation of the single beads.

165 direction. However, in order to achieve an optimal alignment in both horizontal  
 166 and vertical directions, all sub-images, except for the first one, are again shifted in  
 167 the x and y direction, thus optimizing the sum of the differences of all overlapping  
 168 areas. Hence the algorithm performs a grid search. After the stitch of the partial  
 169 images, a very good image of the entire puck is obtained. Still image errors can  
 170 be detected at the boundary regions, which result from optical distortions and a  
 171 varying magnification, leading to a tilt of the optical axis.

172 The beads on the pucks are not evenly distributed like in a grid structure. This  
 173 effect helps with image registration. The latter is necessary to identify the posi-  
 174 tions of individual beads in all images. First of all, the center of all known bead  
 175 positions is calculated for the stitched mask and this center of the mask is shifted  
 176 to the origin of the coordinate system. After centering the image, the centers of  
 177 the pucks lie very well on top of each other, so it is sufficient to primarily optimize  
 178 the rotation angle. After a suitable rotation has been determined, the displacement  
 179 in the x and y directions and the exact angle of rotation can be determined again  
 180 by a grid search. To speed it up, the resolution of the images has been reduced by  
 181 a factor of two for the optimization process. The sum of the differences between  
 182 the two stitched masks is used as an optimization function. The puck position of  
 183 the first image serves as a reference for all further puck images.

### 184 2.3.2 Accurate registration

185 After the first registration, the puck images lie very well on top of each other, but  
 186 the positions of the individual beads deviate from each other due to imaging errors  
 187 during the image recording. For this reason, a fine adjustment is necessary. The  
 188 two puck images to be registered are broken down into small image patches. The  
 189 bead positions contained in each patch are known. The patch will be shifted till the  
 190 sum of distances between the points is minimized. If the difference between two  
 191 points in the different patches is less than 4 pixels, the points will be considered as



192 being congruent. With this method, points of all other sequences can be assigned  
193 for each point of the first sequence.

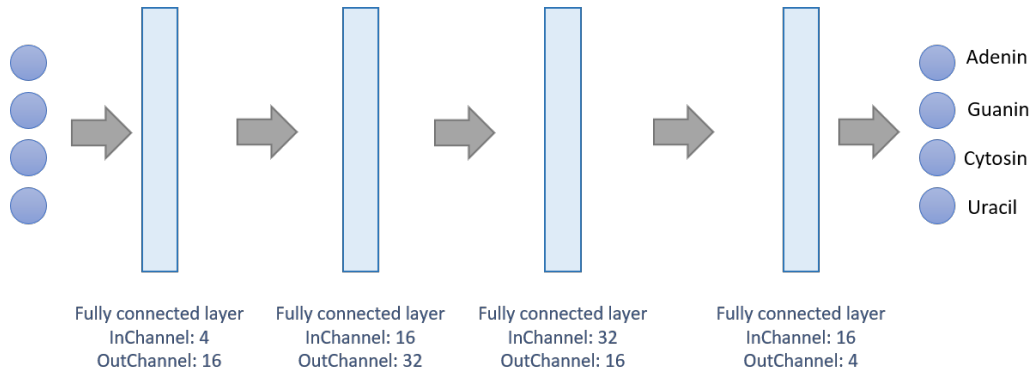

Figure 5: The architecture of the neural network for the estimation of the base based on the gray values of the fluorescence images.

### 194 2.3.3 DNA base estimation

195 After the fine adjustment, the position of each individual bead in the 14 puck im-  
196 ages is known, so the related DNA base can be assigned from the fluorescence im-  
197 ages. In comparison to the confocal microscope, the spectral channels (RGB) of  
198 the epifluorescence microscope are not clearly separated from each other, and so  
199 there is cross talk between the image channels. Since a threshold value definition  
200 is not possible due to the different dye intensities, a neural network was trained  
201 to predict the DNA bases from the fluorescence images. The network architec-  
202 ture is shown in Figure 5. The ADAM optimizer was used with a learning rate  
203 of 0.001 and a mean squared error loss function was deployed. Altogether 1575  
204 data samples were used for training and 171 for testing. The training data set for  
205 the network training was generated as follows: The dominant color of 1746 beads  
206 was read manually from the images of the confocal microscope and the corre-  
207 sponding beads were identified in the epifluorescence microscope image. Based  
208 on the dominating image intensity in the 4 fluorescence channels of the confocal  
209 microscope, the network learns to identify one of the four assigned DNA bases.

## 210 **3 Results and Discussion**

### 211 **3.1 Image statistics**

212 Visual inspection of all sequences from one puck revealed that 428 patches out of  
213 1288 had changes in the number of beads in the frame. For image 6, the number  
214 of changes in the total number of beads per patch for each sequence is shown for  
215 all 1288 images. The most frequent changes occurred in sequences 1, 2, 4, 5.  
216 These sequences were imaged last. Therefore, the beads become a bit unstable  
217 on the puck. The beads are attached to the carrier material using an adhesive.  
218 After multiple washing processes, individual beads can leave their place. The  
219 most common change in the sequences is the disappearance or addition of a bead.

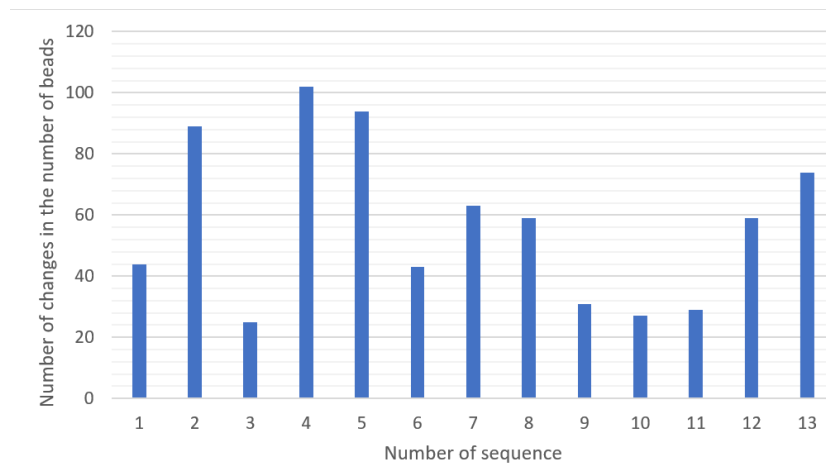

Figure 6: Frequency of the changes in the number of beads per sequence.

### 220 **3.2 Preprocessing of partial images**

221 First, a binary mask has to be created in order to become independent of any  
222 optical distortions of incident light during image recording. A neural network  
223 receives the image in the visible light range as input and uses it to estimate a  
224 rough segmentation of the beads. Based on the segmented beads, the position of  
225 their center point can be calculated for each segment. Then, in an empty image,  
226 a corresponding circle with a radius of 3 pixels is drawn at all identified bead  
227 positions. The individual steps of mask generation are highlighted in figure 7.  
228 These steps are repeated for each of the nine partial images.

229 Although the neural network was only trained using an image data set to create  
230 the segmentation, it is able to generate a very precise segmentation. The reason

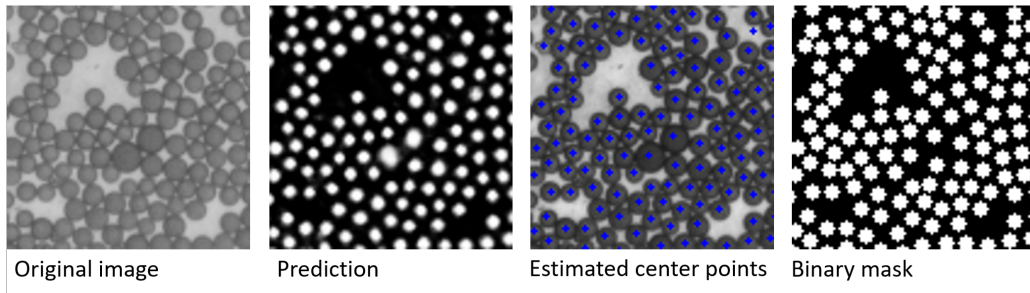

Figure 7: Single steps of the process of binary mask generation.

231 for this is that the network architecture is chosen to be as small as possible, so  
 232 that even a small number of training examples is sufficient for the network to  
 233 generalize [13, 7]. In Figure 8 the training and validation loss for the training  
 234 process is shown. A binary image is created by calculating the center point and  
 235 then generating uniformly sized points.

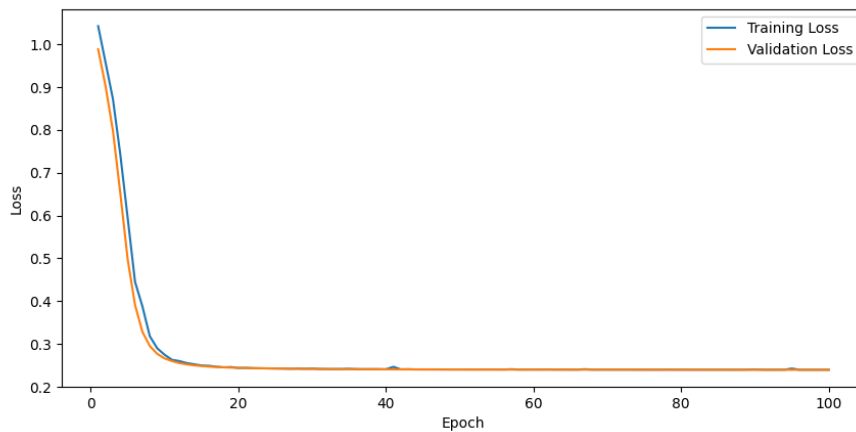

Figure 8: Training and validation loss for the neural network over the epochs.

236 Next, the nine sub-images were stitched together to form an entire image.  
 237 The related stitching algorithm minimizes the sum of the positional differences  
 238 in the overlap region. The stitched mask is shown in Figure 9. In the zoomed-in  
 239 area, small errors can be seen at the boundaries. In order to show the overlapping  
 240 regions better, the pixel intensities of the sub-images were subtracted from each  
 241 other when composing the image, and the absolute amount was taken. As a result,  
 242 a perfect overlap would be represented as a homogeneous green stripe resulting  
 243 from the overlap of the underlying RGB channel colors. Looking more closely at  
 244 the overlapping regions, it becomes clear that some border areas match very well,

245 while others exhibit larger deviations. In addition, individual yellow beads can be  
246 seen, which are then only present in one of the two images. The stitching process  
247 is performed for all 14 sequences.

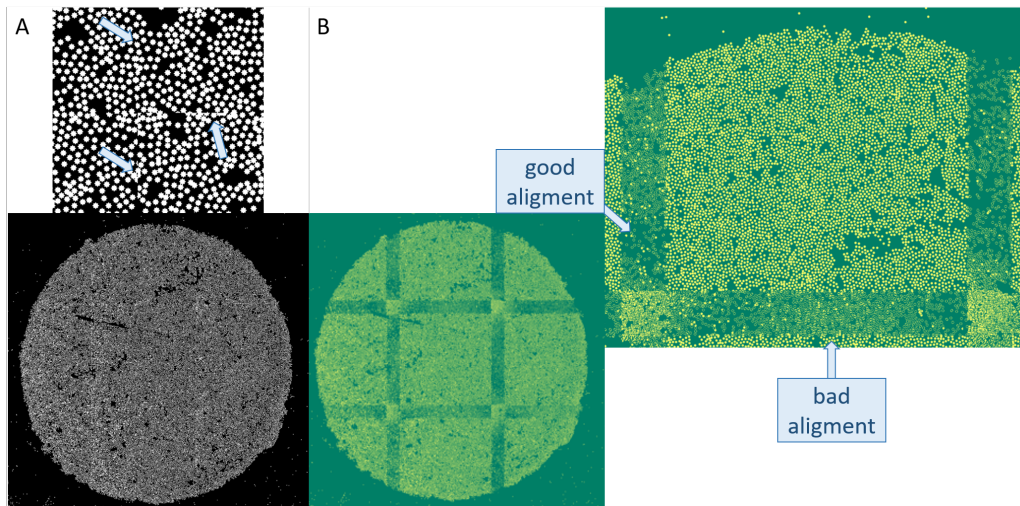

Figure 9: A. Stitched binary mask with a zoomed region, where the stitching errors are marked with blue arrows. B. The stitched images, where the absolute difference between the partial images was calculated, therefore the overlapping regions can be seen clearly. In a perfect scenario, the overlap regions would be dark green.

248 While lens distortion poses a significant hurdle for precision measurements in  
249 microscopy, current correction techniques are limited by their need for detailed  
250 knowledge about the microscope's lens design. This requirement makes them  
251 impractical in many situations [8, 12]. The algorithm presented is developed in  
252 such a way that it is able to process the images despite optical distortions.

253 After an entire image of all sequences has been registered, the former can be  
254 registered on top of each other. The first recorded sequence serves as a reference  
255 for the others. The global images of each sequence are centered, which means that  
256 the centers of the pucks are already very well aligned. Next, the angle of rotation  
257 is optimized. The displacement in the x and y direction is then varied in ever  
258 smaller increments and smaller angles of rotation are also tried out. The result is  
259 a very good registration of the two puck images (see Figure 10).

260 After the global images have been co-registered, small image patches were  
261 then optimized. In order to check whether the same bead was detected in each se-  
262 quence, 1000 bead positions in 14 sequences each were checked manually. Over-  
263 all, 90% of the beads were correctly assigned in all 14 sequences.

264 The last step of the method is to estimate the DNA base assigned to each bead.

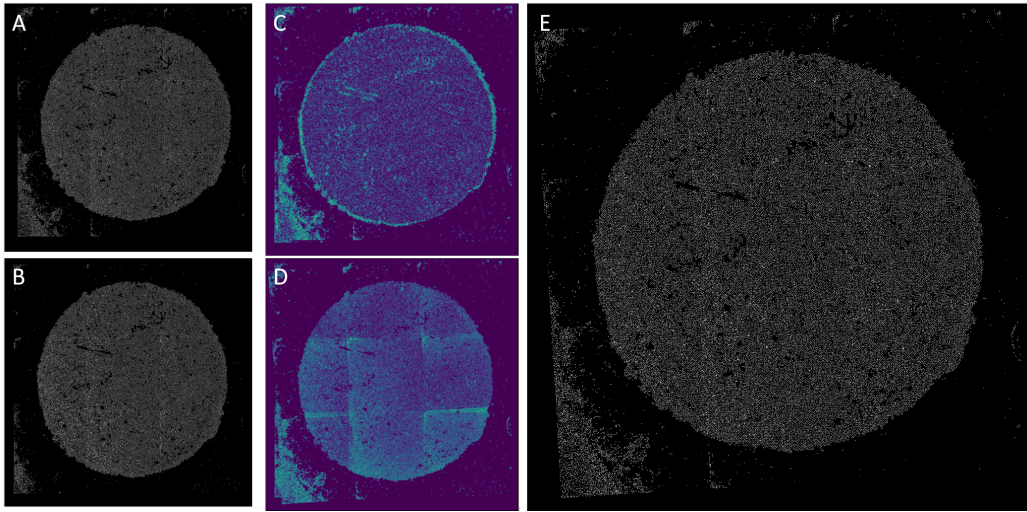

Figure 10: A. Stitched mask from the first sequence. B. Stitched mask from the second sequence. C. Absolute difference image of images A and B before registration. D. Absolute difference image of images A and B after registration. E. Transformed image B after registration.

265 Therefore a neural network was trained to estimate the DNA base with respect  
 266 to the gray values of the four fluorescence images. The network was trained for  
 267 100 epochs and tested on the test set. The overall accuracy of the prediction was  
 268 98.2%. Consequently, the optical assignment of a DNA base is possible only using  
 269 an epifluorescence microscope, a confocal microscope is not needed. This result  
 270 helps researchers to save quite some time and money.

## 271 4 Conclusion

272 We presented an adopted approach for analysing gene expressions at the single-  
 273 cell level from the Slide-seq method. The image processing pipeline extracts RNA  
 274 sequences of cells from roughly 50 000 DNA barcode beads. The new method en-  
 275 ables the use of an inexpensive epifluorescence microscope instead of a confocal  
 276 microscope. Hence it offers an efficient and less complex toll for spatially re-  
 277 solved transcriptomics than existing alternatives.

## 278 References

- 279 [1] Leonie Brockmann, Shiwa Soukou, Babett Steglich, Paulo Czarnewski,  
 280 Lilan Zhao, Sandra Wende, Tanja Bedke, Can Ergen, Carolin Manthey,

- 281 Theodora Agaloti, et al. Molecular and functional heterogeneity of il-10-  
282 producing cd4+ t cells. *Nature communications*, 9(1):5457, 2018.
- 283 [2] Kok Hao Chen, Alistair N Boettiger, Jeffrey R Moffitt, Siyuan Wang, and  
284 Xiaowei Zhuang. Spatially resolved, highly multiplexed rna profiling in sin-  
285 gles cells. *Science*, 348(6233):aaa6090, 2015.
- 286 [3] Sarah Cormican and Matthew D Griffin. Human monocyte subset distinc-  
287 tions and function: insights from gene expression analysis. *Frontiers in*  
288 *immunology*, 11:1070, 2020.
- 289 [4] Laura T Donlin, Sung-Ho Park, Eugenia Giannopoulou, Aleksandra Iovic,  
290 Kyung-Hyun Park-Min, Richard M Siegel, and Lionel B Ivashkiv. Insights  
291 into rheumatic diseases from next-generation sequencing. *Nature Reviews*  
292 *Rheumatology*, 15(6):327–339, 2019.
- 293 [5] Joerg Ermann, Deepak A Rao, Nikola C Teslovich, Michael B Brenner, and  
294 Soumya Raychaudhuri. Immune cell profiling to guide therapeutic decisions  
295 in rheumatic diseases. *Nature Reviews Rheumatology*, 11(9):541–551, 2015.
- 296 [6] Hosung Jung, Christos G Gkogkas, Nahum Sonenberg, and Christine E Holt.  
297 Remote control of gene function by local translation. *Cell*, 157(1):26–40,  
298 2014.
- 299 [7] Robert Lanouette, Jules Thibault, and Jacques L Valade. Process model-  
300 ing with neural networks using small experimental datasets. *Computers &*  
301 *Chemical Engineering*, 23(9):1167–1176, 1999.
- 302 [8] Xingjian Liu, Zhongwei Li, Kai Zhong, YuhJin Chao, Pedro Miraldo, and  
303 Yusheng Shi. Generic distortion model for metrology under optical micro-  
304 scopes. *Optics and Lasers in Engineering*, 103:119–126, 2018.
- 305 [9] Diarmuid Mulherin, Oliver Fitzgerald, and Barry Bresnihan. Synovial tis-  
306 sue macrophage populations and articular damage in rheumatoid arthri-  
307 tis. *Arthritis & Rheumatism: Official Journal of the American College of*  
308 *Rheumatology*, 39(1):115–124, 1996.
- 309 [10] Brian Munsky, Gregor Neuert, and Alexander Van Oudenaarden. Using gene  
310 expression noise to understand gene regulation. *Science*, 336(6078):183–  
311 187, 2012.
- 312 [11] Carl Nathan and Aihao Ding. Nonresolving inflammation. *Cell*, 140(6):871–  
313 882, 2010.

- 314 [12] JC Olivo, E Kahn, S Halpern, and P Fragu. Image registration and distortion  
315 correction in ion microscopy. *Journal of microscopy*, 164(3):263–272, 1991.
- 316 [13] Antonello Pasini. Artificial neural networks for small dataset analysis. *Jour-*  
317 *nal of thoracic disease*, 7(5):953, 2015.
- 318 [14] Samuel G Rodrigues, Robert R Stickels, Aleksandrina Goeva, Carly A Mar-  
319 tin, Evan Murray, Charles R Vanderburg, Joshua Welch, Linlin M Chen,  
320 Fei Chen, and Evan Z Macosko. Slide-seq: A scalable technology for  
321 measuring genome-wide expression at high spatial resolution. *Science*,  
322 363(6434):1463–1467, 2019.
- 323 [15] Patrik L Ståhl, Fredrik Salmén, Sanja Vickovic, Anna Lundmark,  
324 José Fernández Navarro, Jens Magnusson, Stefania Giacomello, Michaela  
325 Asp, Jakub O Westholm, Mikael Huss, et al. Visualization and analysis  
326 of gene expression in tissue sections by spatial transcriptomics. *Science*,  
327 353(6294):78–82, 2016.
- 328 [16] Robert R Stickels, Evan Murray, Pawan Kumar, Jilong Li, Jamie L Marshall,  
329 Daniela J Di Bella, Paola Arlotta, Evan Z Macosko, and Fei Chen. Highly  
330 sensitive spatial transcriptomics at near-cellular resolution with slide-seqv2.  
331 *Nature biotechnology*, 39(3):313–319, 2021.
- 332 [17] Valentine Svensson, Roser Vento-Tormo, and Sarah A Teichmann. Expo-  
333 nential scaling of single-cell rna-seq in the past decade. *Nature protocols*,  
334 13(4):599–604, 2018.
- 335 [18] Yuichi Taniguchi, Paul J Choi, Gene-Wei Li, Huiyi Chen, Mohan Babu,  
336 Jeremy Hearn, Andrew Emili, and X Sunney Xie. Quantifying e. coli pro-  
337 teome and transcriptome with single-molecule sensitivity in single cells. *sci-*  
338 *ence*, 329(5991):533–538, 2010.
- 339 [19] Sanja Vickovic, Gökçen Eraslan, Fredrik Salmén, Johanna Klughammer,  
340 Linnea Stenbeck, Denis Schapiro, Tarmo Äijö, Richard Bonneau, Ludvig  
341 Bergenstråhle, José Fernández Navarro, et al. High-definition spatial tran-  
342 scriptomics for in situ tissue profiling. *Nature methods*, 16(10):987–990,  
343 2019.
- 344 [20] Cameron G Williams, Hyun Jae Lee, Takahiro Asatsuma, Roser Vento-  
345 Tormo, and Ashraf Haque. An introduction to spatial transcriptomics for  
346 biomedical research. *Genome Medicine*, 14(1):1–18, 2022.

- 347 [21] Mingyue Yan, Zewen Sun, Junjie Wang, Haibo Zhao, Tengbo Yu, Yingze  
348 Zhang, and Tianrui Wang. Single-cell rna sequencing reveals distinct chon-  
349 drocyte states in femoral cartilage under weight-bearing load in rheumatoid  
350 arthritis. *Frontiers in Immunology*, 14, 2023.
- 351 [22] Fan Zhang, Kevin Wei, Kamil Slowikowski, Chamith Y Fonseka, Deepak A  
352 Rao, Stephen Kelly, Susan M Goodman, Darren Tabechian, Laura B Hughes,  
353 Karen Salomon-Escoto, et al. Defining inflammatory cell states in rheuma-  
354 toid arthritis joint synovial tissues by integrating single-cell transcriptomics  
355 and mass cytometry. *Nature immunology*, 20(7):928–942, 2019.
